# Supplementary material for: Loss of digestive organ expansion factor (Diexf) reveals an essential role during murine embryonic development that is independent of p53
Source: PubMed Central journal article supplement (PMC5732782; doi:10.18632/oncotarget.22087), 2017-10-26
Supplement: oncotarget-08-103996-s001.pdf [file oncotarget-08-103996-s001.pdf]

## Loss of digestive organ expansion factor (*Diexf*) reveals an essential role during murine embryonic development that is independent of p53

### SUPPLEMENTARY MATERIALS

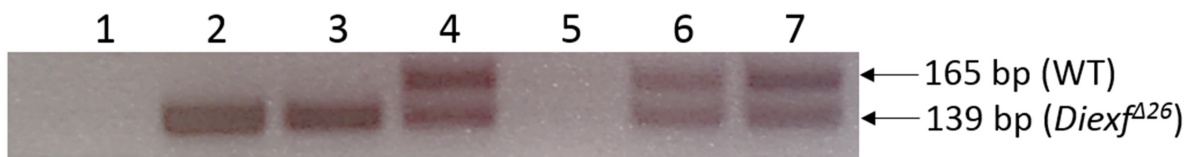

**Supplementary Figure 1: Genotyping of blastocysts.** Agarose gel electrophoresis of pcr products from blastocyst DNA showing wild type band (165 bp) and mutant band (139 bp). Lanes 2 and 3 show a single mutant band indicating *Diexf*<sup>Δ26/Δ26</sup> blastocysts.

**Supplementary Table 1: List of On- and off-target sites for sgRNAs.** See\_Supplementary\_Table 1.
